# Supplementary material for: Flavonol Profile Is a Reliable Indicator to Assess Canopy Architecture and the Exposure of Red Wine Grapes to Solar Radiation
Source: PubMed Central journal article supplement (PMC6365461; doi:10.3389/fpls.2019.00010), 2019-01-31
Supplement: Data_Sheet_1.pdf [file Data_Sheet_1.pdf]

**Gradient for 2% HCOOH**

| Time (min) | Target % (V/V) |         |                    |
|------------|----------------|---------|--------------------|
|            | % ACN          | % HCOOH | % H <sub>2</sub> O |
| 0          | 8              | 2       | 90                 |
| 8          | 8              | 2       | 90                 |
| 25         | 12.2           | 2       | 85.8               |
| 35         | 16.9           | 2       | 81.1               |
| 70         | 35.7           | 2       | 62.3               |
| 70         | 65             | 2       | 33                 |
| 75         | 65             | 2       | 33                 |
| 80         | 8              | 2       | 90                 |
| 90         | 8              | 2       | 90                 |

| Gradient                                    |                                |
|---------------------------------------------|--------------------------------|
| % Phase A<br>(2% HCOOH in H <sub>2</sub> O) | % Phase B<br>(2% HCOOH in ACN) |
| 91.8                                        | 8.2                            |
| 91.8                                        | 8.2                            |
| 87.6                                        | 12.4                           |
| 82.8                                        | 17.2                           |
| 63.6                                        | 36.4                           |
| 33.7                                        | 66.3                           |
| 33.7                                        | 66.3                           |
| 91.8                                        | 8.2                            |
| 91.8                                        | 8.2                            |

**Gradient for 4% HCOOH**

| Time (min) | Target % (V/V) |         |                    |
|------------|----------------|---------|--------------------|
|            | % ACN          | % HCOOH | % H <sub>2</sub> O |
| 0          | 8              | 4       | 88                 |
| 8          | 8              | 4       | 88                 |
| 25         | 12.2           | 4       | 83.8               |
| 35         | 16.9           | 4       | 79.1               |
| 70         | 35.7           | 4       | 60.3               |
| 70         | 65             | 4       | 31                 |
| 75         | 65             | 4       | 31                 |
| 80         | 8              | 4       | 88                 |
| 90         | 8              | 4       | 88                 |

| Gradient                                    |                                |
|---------------------------------------------|--------------------------------|
| % Phase A<br>(4% HCOOH in H <sub>2</sub> O) | % Phase B<br>(4% HCOOH in ACN) |
| 91.7                                        | 8.3                            |
| 91.7                                        | 8.3                            |
| 87.3                                        | 12.7                           |
| 82.4                                        | 17.6                           |
| 62.8                                        | 37.2                           |
| 32.3                                        | 67.7                           |
| 32.3                                        | 67.7                           |
| 91.7                                        | 8.3                            |
| 91.7                                        | 8.3                            |

**Gradient for 5% HCOOH**

| Time (min) | Target % (V/V) |         |                    |
|------------|----------------|---------|--------------------|
|            | % ACN          | % HCOOH | % H <sub>2</sub> O |
| 0          | 8              | 5       | 87                 |
| 8          | 8              | 5       | 87                 |
| 25         | 12.2           | 5       | 82.8               |
| 35         | 16.9           | 5       | 78.1               |
| 70         | 35.7           | 5       | 59.3               |
| 70         | 65             | 5       | 30                 |
| 75         | 65             | 5       | 30                 |
| 80         | 8              | 5       | 87                 |
| 90         | 8              | 5       | 87                 |

| Gradient                                    |                                |
|---------------------------------------------|--------------------------------|
| % Phase A<br>(5% HCOOH in H <sub>2</sub> O) | % Phase B<br>(5% HCOOH in ACN) |
| 91.6                                        | 8.4                            |
| 91.6                                        | 8.4                            |
| 87.2                                        | 12.8                           |
| 82.2                                        | 17.8                           |
| 62.4                                        | 37.6                           |
| 31.6                                        | 68.4                           |
| 31.6                                        | 68.4                           |
| 91.6                                        | 8.4                            |
| 91.6                                        | 8.4                            |

**Gradient for 10% HCOOH**

| Time (min) | Target % (V/V) |         |                    |
|------------|----------------|---------|--------------------|
|            | % ACN          | % HCOOH | % H <sub>2</sub> O |
| 0          | 8              | 10      | 82                 |
| 8          | 8              | 10      | 82                 |
| 25         | 12.2           | 10      | 77.8               |
| 35         | 16.9           | 10      | 73.1               |
| 70         | 35.7           | 10      | 54.3               |
| 70         | 65             | 10      | 25                 |
| 75         | 65             | 10      | 25                 |
| 80         | 8              | 10      | 82                 |
| 90         | 8              | 10      | 82                 |

| Gradient                                     |                                 |
|----------------------------------------------|---------------------------------|
| % Phase A<br>(10% HCOOH in H <sub>2</sub> O) | % Phase B<br>(10% HCOOH in ACN) |
| 91.1                                         | 8.9                             |
| 91.1                                         | 8.9                             |
| 86.4                                         | 13.6                            |
| 81.2                                         | 18.8                            |
| 60.3                                         | 39.7                            |
| 27.8                                         | 72.2                            |
| 27.8                                         | 72.2                            |
| 91.1                                         | 8.9                             |
| 91.1                                         | 8.9                             |
